# Supplementary material
Source: JCI journal article supplement (doi:10.1172/jci200381)

Uncropped gel in Figure S2A

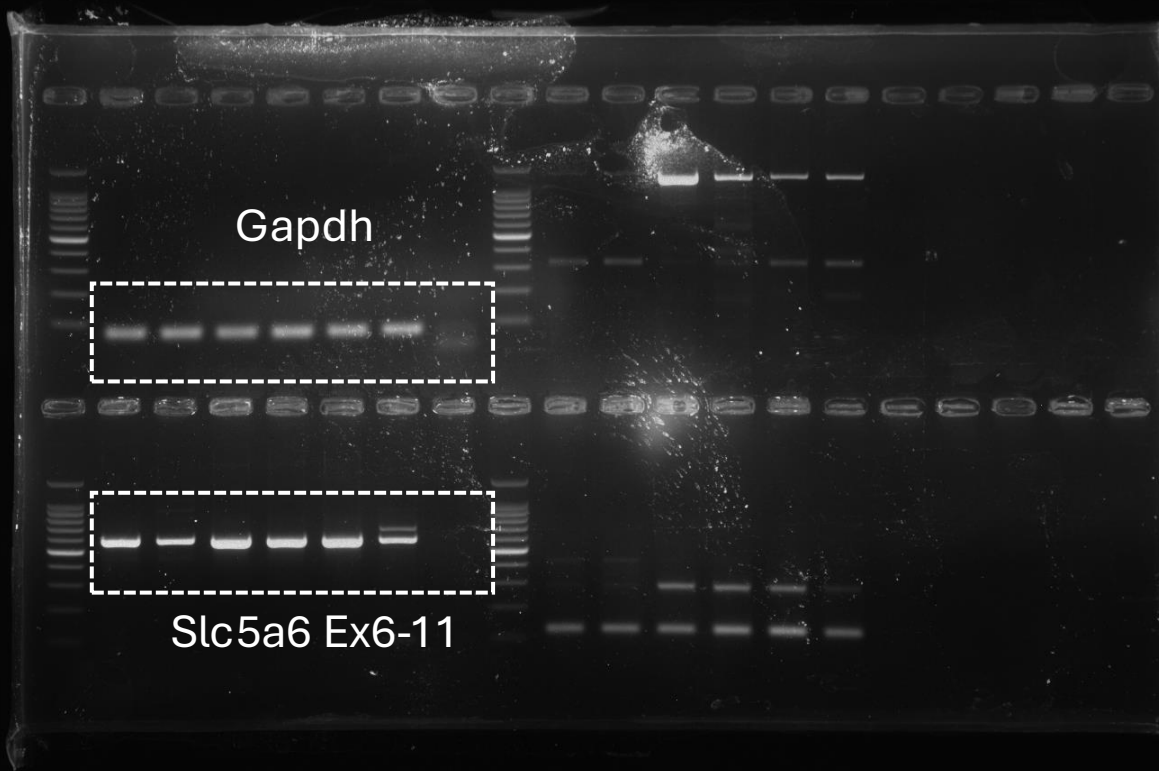

Uncropped gel in Figure S2N

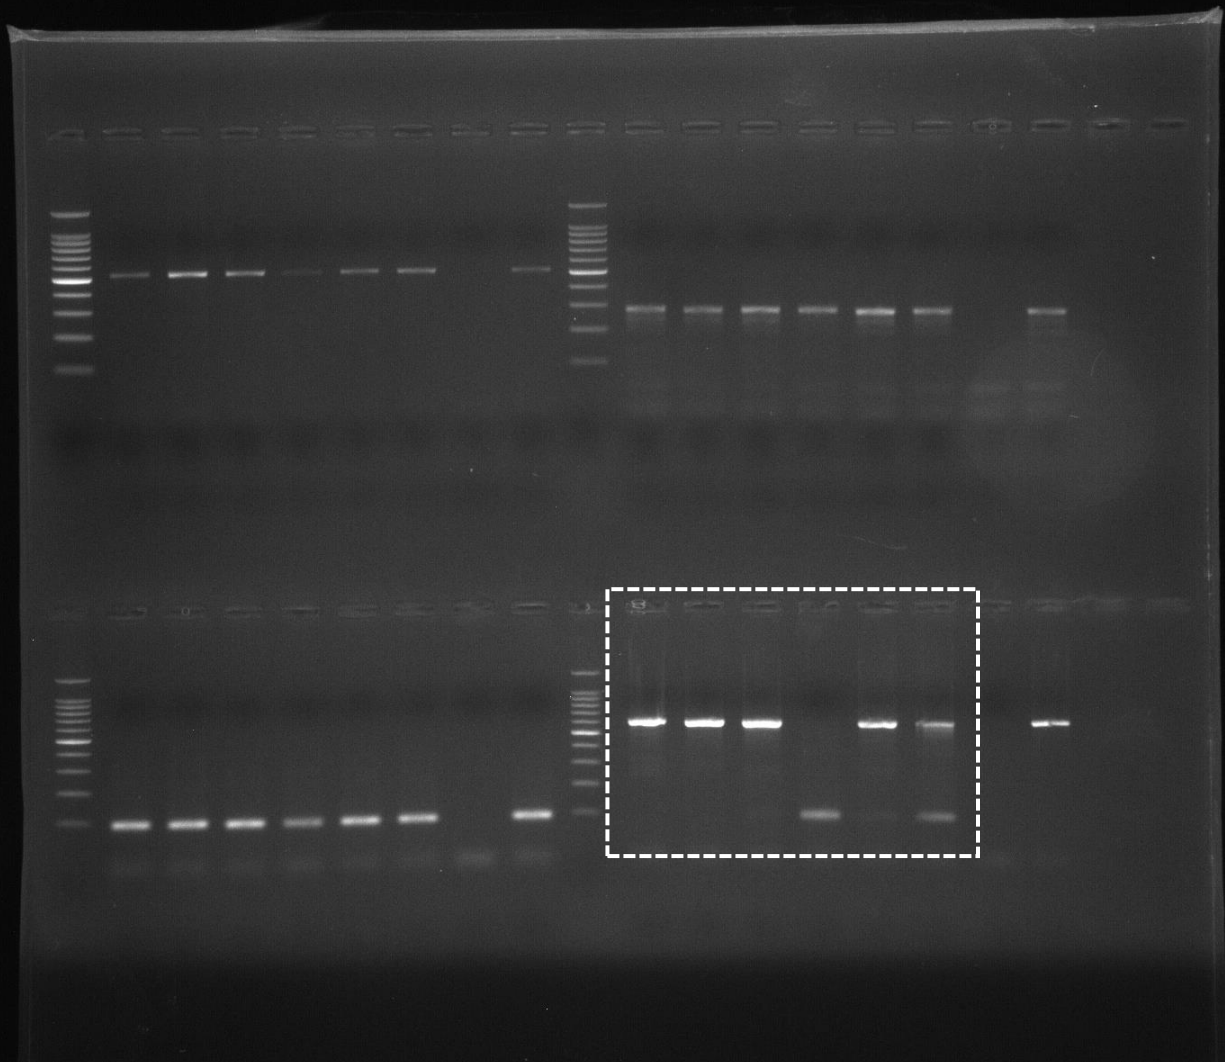

# Uncropped blots for Figure S4

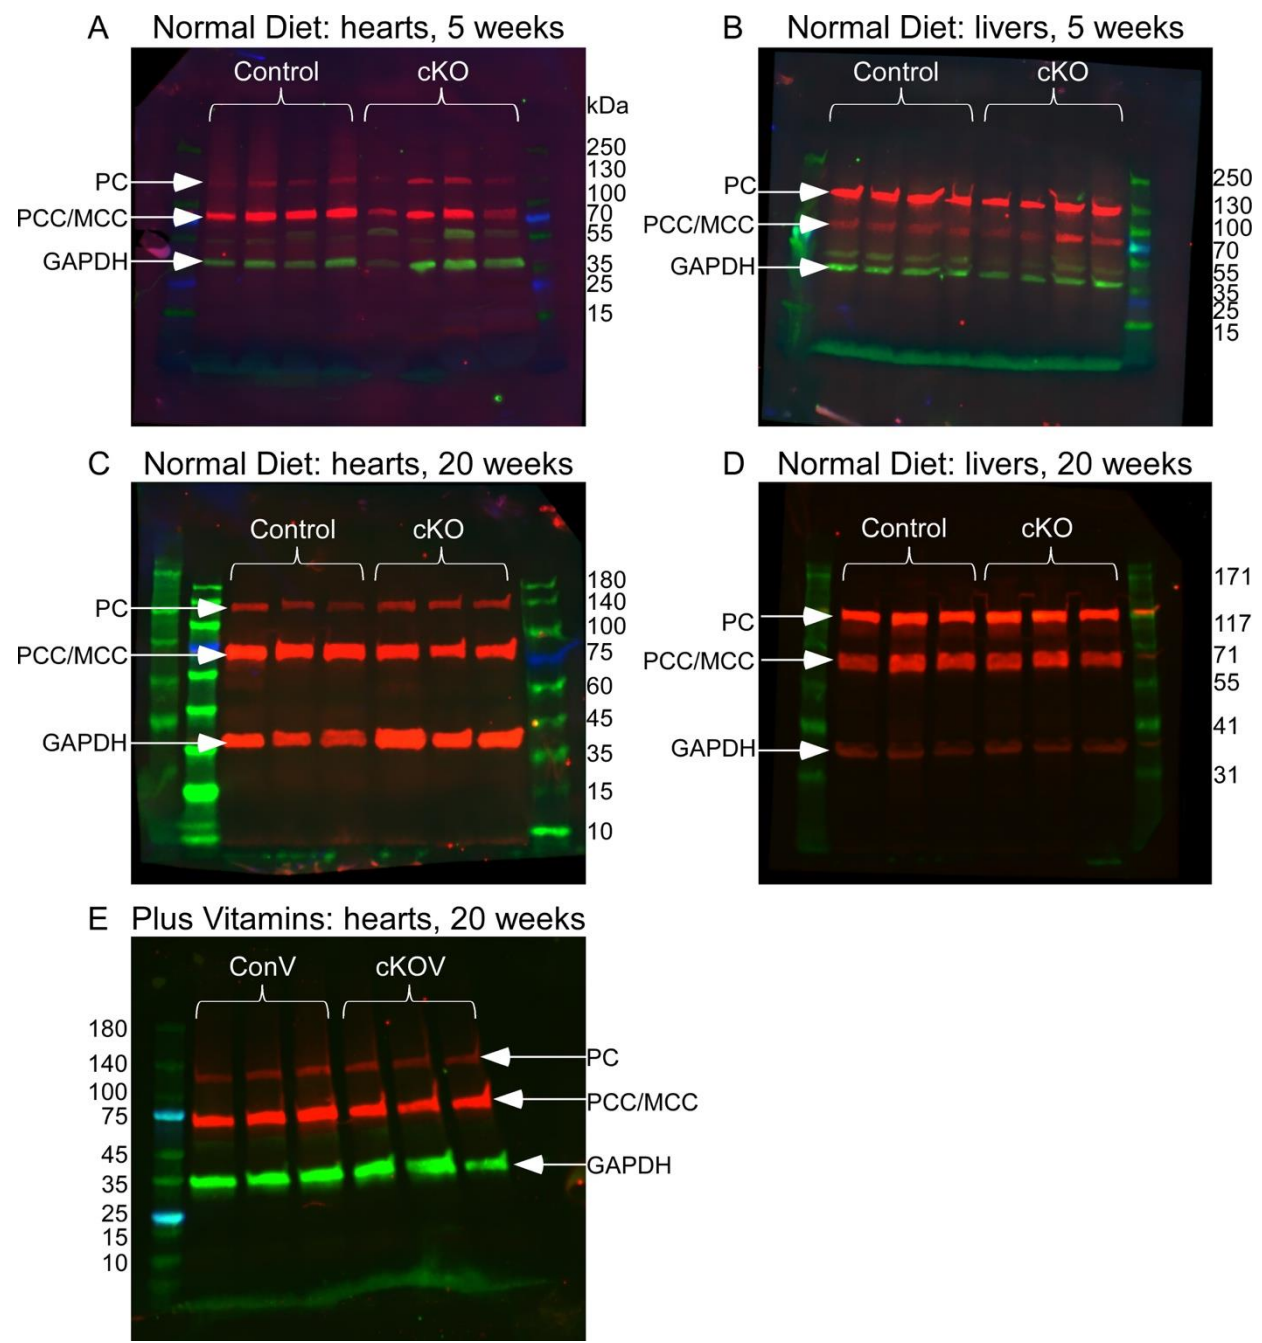

# Uncropped blots for Figure S8

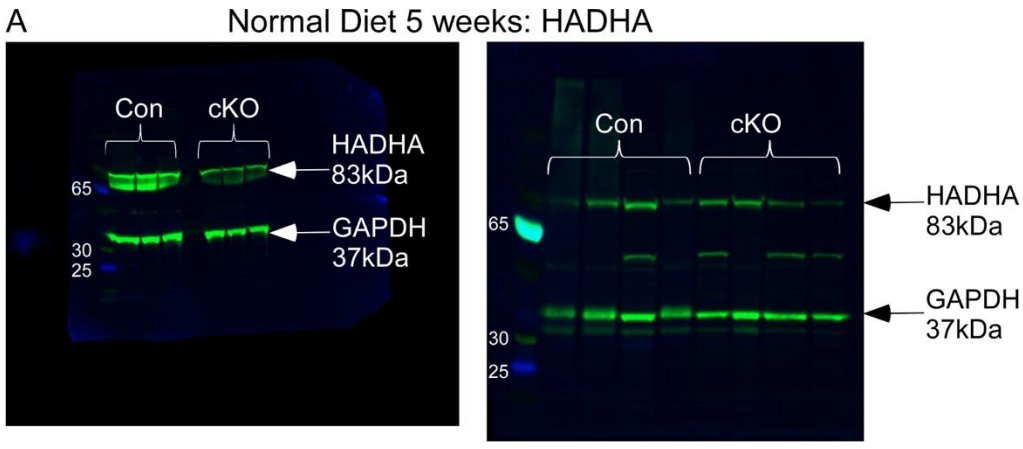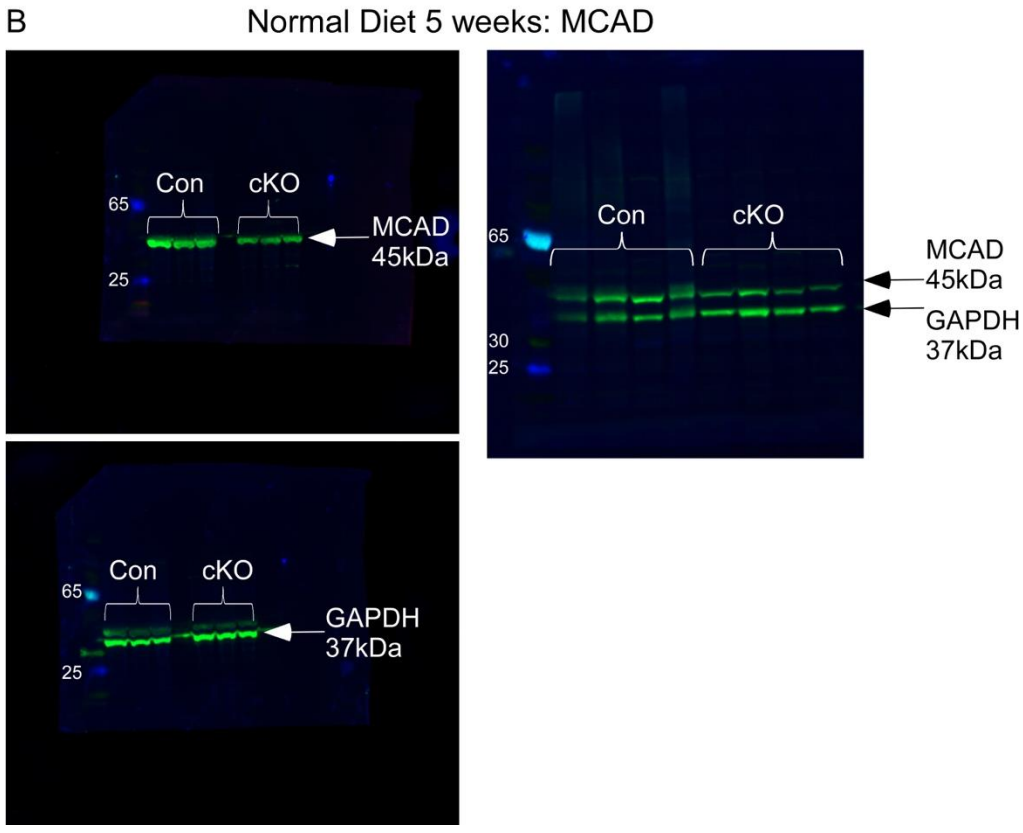

Supplement: sd1 [file 1]
